# Supplementary material
Source: PubMed Central journal article supplement (PMC5950998)
Supplement: Supplementary_material_025.pdf [file Supplementary_material_025.pdf]

## Supplementary material

### Appendix 1: Manufacturer Calibration Methods for the BGMSs Included in These Analyses

**Supplementary Table 1. Manufacturer Calibration Methods for BGMSs (Clinical Trial #1)**

| <b>Meter system</b> | <b>Test strip name</b> | <b>Manufacturer calibration method</b> |
|---------------------|------------------------|----------------------------------------|
| EZ                  | Contour Next           | Glucose oxidase (YSI) [1]              |
| ACA                 | Accu-Chek Aviva Plus   | Hexokinase [2]                         |
| FFL                 | FreeStyle Lite         | Glucose oxidase (YSI) [3]              |
| OTU2                | OneTouch Ultra Blue    | Glucose oxidase (YSI) [4]              |
| TT                  | Truetrack              | Glucose oxidase (YSI) [5]              |

**Supplementary Table 2. Manufacturer Calibration Methods for BGMSs (Clinical Trial #2)**

| <b>Meter system</b> | <b>Test strip name</b> | <b>Manufacturer calibration method</b> |
|---------------------|------------------------|----------------------------------------|
| CN                  | Contour Next           | Glucose oxidase (YSI) [6]              |
| ACAN                | Accu-Chek Aviva        | Hexokinase [7]                         |
| FSL                 | FreeStyle Lite         | Glucose oxidase (YSI) [3]              |
| OTU2                | OneTouch Ultra Blue    | Glucose oxidase (YSI) [4]              |
| OTVP                | OneTouch Verio         | Glucose oxidase (YSI) [8]              |
| TT                  | Truetrack              | Glucose oxidase (YSI) [5]              |

## References

- [1] Contour Next EZ Blood Glucose Monitoring System User Guide. Mishawaka, IN: Bayer HealthCare LLC; 2012.
- [2] US Food and Drug Administration. 510(k) Substantial Equivalence Determination Decision Summary: Accu-Chek Aviva Plus Blood Glucose Monitoring System (K101299). September 21, 2011. Available from: [http://www.accessdata.fda.gov/cdrh\\_docs/reviews/K101299.pdf](http://www.accessdata.fda.gov/cdrh_docs/reviews/K101299.pdf).

- [3] FreeStyle Lite Blood Glucose Test Strips Product Information. Alameda, CA: Abbott Diabetes Care, Inc; 2012.
- [4] OneTouch Ultra Blue Test Strips [package insert]. Milpitas, CA: LifeScan, Inc; 2010.
- [5] Truetrack Owner's Booklet. Fort Lauderdale, FL: Nipro Diagnostics, Inc; 2015.
- [6] Contour Next Blood Glucose Monitoring System User Guide. Parsippany, NJ: Ascensia Diabetes Care US, Inc; 2016.
- [7] US Food and Drug Administration. 510(k) Substantial Equivalence Determination Decision Summary: Accu-Chek Aviva glucose monitoring system (K060620). August 11, 2006. Available from: [http://www.accessdata.fda.gov/cdrh\\_docs/reviews/K060620.pdf](http://www.accessdata.fda.gov/cdrh_docs/reviews/K060620.pdf).
- [8] OneTouch Verio Test Strips [package insert]. Milpitas, CA: LifeScan, Inc; 2011.
